# Supplementary material
Source: PubMed Central journal article supplement (PMC4254025)
Supplement: NIHMS618017-supplement-01.pdf [file NIHMS618017-supplement-01.pdf]

# CONFLICT OF INTEREST STATEMENT

## *The Journal of Arthroplasty*

(Adopted from the American Academy of Orthopaedic Surgeons disclosure statement)

The following form **must be filled out completely and submitted by each author (example, 6 authors, 6 forms). If no discloser is required, please write/type "none" at the end of each sentence.**

**Manuscript Title: Total Knee Arthroplasty Transfusion Trends, Length of Stay, and Complications: Nationwide Inpatient Sample 2000 – 2009**

1. Royalties from a company or supplier (The following conflicts were disclosed)  
none
2. Speakers bureau/paid presentations for a company or supplier (The following conflicts were disclosed)  
none
- 3A. Paid employee for a company or supplier (The following conflicts were disclosed)  
none
- 3B. Paid consultant for a company or supplier (The following conflicts were disclosed)  
none
- 3C. Unpaid consultants for a company or supplier (The following conflicts were disclosed)  
none
4. Stock or stock options in a company or supplier (The following conflicts were disclosed)  
none
5. Research support from a company or supplier as a Principal Investigator (The following conflicts were disclosed)  
none
6. Other financial or material support from a company or supplier (The following conflicts were disclosed)  
none
7. Royalties, financial or material support from publishers (The following conflicts were disclosed)  
none
8. Medical/Orthopaedic publications editorial/governing board (The following conflicts were disclosed)  
none
9. Board member/committee appointments for a society (The following conflicts were disclosed)  
none

**Each author must sign AND print or type his/her name, date and submit a separate form**

In addition, one BLINDED Conflict of Interest form (no author names used) should be submitted per manuscript with all author disclosures.

Alison K. Klika, MS

Author Name (Print or Type)

  
Author Signature

3/21/14  
Date

# CONFLICT OF INTEREST STATEMENT

## *The Journal of Arthroplasty*

(Adopted from the American Academy of Orthopaedic Surgeons disclosure statement)

The following form **must be filled out completely and submitted by each author (example, 6 authors, 6 forms). If no discloser is required, please write/type "none" at the end of each sentence.**

Manuscript Title: **Total Knee Arthroplasty Transfusion Trends, Length of Stay, and Complications: Nationwide Inpatient Sample 2000 – 2009**

1. Royalties from a company or supplier (The following conflicts were disclosed)  
*None*
2. Speakers bureau/paid presentations for a company or supplier (The following conflicts were disclosed)  
*None*
- 3A. Paid employee for a company or supplier (The following conflicts were disclosed)  
*None*
- 3B. Paid consultant for a company or supplier (The following conflicts were disclosed)  
*None*
- 3C. Unpaid consultants for a company or supplier (The following conflicts were disclosed)  
*None*
4. Stock or stock options in a company or supplier (The following conflicts were disclosed)  
*None*
5. Research support from a company or supplier as a Principal Investigator (The following conflicts were disclosed)  
*None*
6. Other financial or material support from a company or supplier (The following conflicts were disclosed)  
*None*
7. Royalties, financial or material support from publishers (The following conflicts were disclosed)  
*None*
8. Medical/Orthopaedic publications editorial/governing board (The following conflicts were disclosed)  
*None*
9. Board member/committee appointments for a society (The following conflicts were disclosed)  
*None*

**Each author must sign AND print or type his/her name, date and submit a separate form**

In addition, one BLINDED Conflict of Interest form (no author names used) should be submitted per manuscript with all author disclosures.

Travis Small, DO  
Author Name (Print or Type)

  
Author Signature

3/22/14  
Date

# CONFLICT OF INTEREST STATEMENT

## *The Journal of Arthroplasty*

(Adopted from the American Academy of Orthopaedic Surgeons disclosure statement)

The following form **must be filled out completely and submitted by each author (example, 6 authors, 6 forms). If no discloser is required, please write/type "none" at the end of each sentence.**

Manuscript Title: **Total Knee Arthroplasty Transfusion Trends, Length of Stay, and Complications: Nationwide Inpatient Sample 2000 – 2009**

1. Royalties from a company or supplier (The following conflicts were disclosed)  
None
2. Speakers bureau/paid presentations for a company or supplier (The following conflicts were disclosed)  
None
- 3A. Paid employee for a company or supplier (The following conflicts were disclosed)  
None
- 3B. Paid consultant for a company or supplier (The following conflicts were disclosed)  
None
- 3C. Unpaid consultants for a company or supplier (The following conflicts were disclosed)  
None
4. Stock or stock options in a company or supplier (The following conflicts were disclosed)  
None
5. Research support from a company or supplier as a Principal Investigator (The following conflicts were disclosed)  
None
6. Other financial or material support from a company or supplier (The following conflicts were disclosed)  
None
7. Royalties, financial or material support from publishers (The following conflicts were disclosed)  
None
8. Medical/Orthopaedic publications editorial/governing board (The following conflicts were disclosed)  
None
9. Board member/committee appointments for a society (The following conflicts were disclosed)  
None

**Each author must sign AND print or type his/her name, date and submit a separate form**

In addition, one BLINDED Conflict of Interest form (no author names used) should be submitted per manuscript with all author disclosures.

Anas Saleh, MD



3/21/2014

Author Name (Print or Type)

Author Signature

Date

# CONFLICT OF INTEREST STATEMENT

## *The Journal of Arthroplasty*

(Adopted from the American Academy of Orthopaedic Surgeons disclosure statement)

**The following form must be filled out completely and submitted by each author (example, 6 authors, 6 forms). If no discloser is required, please write/type "none" at the end of each sentence.**

**Manuscript Title: Total Knee Arthroplasty Transfusion Trends, Length of Stay, and Complications: Nationwide Inpatient Sample 2000 – 2009**

1. Royalties from a company or supplier (The following conflicts were disclosed)  
**None**
  
2. Speakers bureau/paid presentations for a company or supplier (The following conflicts were disclosed)  
**None**
  
- 3A. Paid employee for a company or supplier (The following conflicts were disclosed)  
**None**
  
- 3B. Paid consultant for a company or supplier (The following conflicts were disclosed)  
**None**
  
- 3C. Unpaid consultants for a company or supplier (The following conflicts were disclosed)  
**None**
  
4. Stock or stock options in a company or supplier (The following conflicts were disclosed)  
**None**
  
5. Research support from a company or supplier as a Principal Investigator (The following conflicts were disclosed)  
**None**
  
6. Other financial or material support from a company or supplier (The following conflicts were disclosed)  
**None**
  
7. Royalties, financial or material support from publishers (The following conflicts were disclosed)  
**None**
  
8. Medical/Orthopaedic publications editorial/governing board (The following conflicts were disclosed)  
**None**
  
9. Board member/committee appointments for a society (The following conflicts were disclosed)  
**None**

**Each author must sign AND print or type his/her name, date and submit a separate form**

In addition, one BLINDED Conflict of Interest form (no author names used) should be submitted per manuscript with all author disclosures.

Caleb R. Szubski, BA  
Author Name (Print or Type)

  
Author Signature

3/21/14  
Date

# CONFLICT OF INTEREST STATEMENT

## *The Journal of Arthroplasty*

(Adopted from the American Academy of Orthopaedic Surgeons disclosure statement)

The following form **must be filled out completely and submitted by each author (example, 6 authors, 6 forms). If no discloser is required, please write/type "none" at the end of each sentence.**

**Manuscript Title: Total Knee Arthroplasty Transfusion Trends, Length of Stay, and Complications: Nationwide Inpatient Sample 2000 – 2009**

1. Royalties from a company or supplier (The following conflicts were disclosed) none
2. Speakers bureau/paid presentations for a company or supplier (The following conflicts were disclosed) none
- 3A. Paid employee for a company or supplier (The following conflicts were disclosed) none
- 3B. Paid consultant for a company or supplier (The following conflicts were disclosed) none
- 3C. Unpaid consultants for a company or supplier (The following conflicts were disclosed) none
4. Stock or stock options in a company or supplier (The following conflicts were disclosed) none
5. Research support from a company or supplier as a Principal Investigator (The following conflicts were disclosed) none
6. Other financial or material support from a company or supplier (The following conflicts were disclosed) none
7. Royalties, financial or material support from publishers (The following conflicts were disclosed) none
8. Medical/Orthopaedic publications editorial/governing board (The following conflicts were disclosed) none
9. Board member/committee appointments for a society (The following conflicts were disclosed) none

**Each author must sign AND print or type his/her name, date and submit a separate form**

In addition, one BLINDED Conflict of Interest form (no author names used) should be submitted per manuscript with all author disclosures.

Aiswarya Lekshmi Pillai Chandran Pillai, MD, MS

*Aiswarya Pillai*  
Author Signature

03/24/2014

Author Name (Print or Type)

Date

# CONFLICT OF INTEREST STATEMENT

## *The Journal of Arthroplasty*

(Adopted from the American Academy of Orthopaedic Surgeons disclosure statement)

The following form **must be filled out completely and submitted by each author (example, 6 authors, 6 forms). If no discloser is required, please write/type "none" at the end of each sentence.**

Manuscript Title: **Total Knee Arthroplasty Transfusion Trends, Length of Stay, and Complications: Nationwide Inpatient Sample 2000 – 2009**

1. Royalties from a company or supplier (The following conflicts were disclosed)  
**Stryker Orthopaedics, Exactech, Wright Medical, Shukla Medical, Zimmer**
2. Speakers bureau/paid presentations for a company or supplier (The following conflicts were disclosed)  
**Stryker Orthopaedics**
- 3A. Paid employee for a company or supplier (The following conflicts were disclosed)  
**None**
- 3B. Paid consultant for a company or supplier (The following conflicts were disclosed)  
**Stryker Orthopaedics, Shukla Medical**
- 3C. Unpaid consultants for a company or supplier (The following conflicts were disclosed)  
**None**
4. Stock or stock options in a company or supplier (The following conflicts were disclosed)  
**OtisMed Corporation, Custom Orthopaedic Solutions, iVHR**
5. Research support from a company or supplier as a Principal Investigator (The following conflicts were disclosed)  
**OtisMed Corporation, Custom Orthopaedic Solutions, iVHR**
6. Other financial or material support from a company or supplier (The following conflicts were disclosed)  
**None**
7. Royalties, financial or material support from publishers (The following conflicts were disclosed)  
**None**
8. Medical/Orthopaedic publications editorial/governing board (The following conflicts were disclosed)  
**None**
9. Board member/committee appointments for a society (The following conflicts were disclosed)  
**None**

**Each author must sign AND print or type his/her name, date and submit a separate form**

In addition, one BLINDED Conflict of Interest form (no author names used) should be submitted per manuscript with all author disclosures.

Wael K. Barsoum, MD

Author Name (Print or Type)

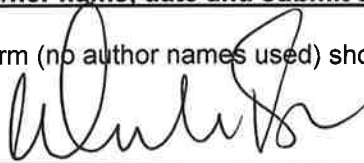

Author Signature

3/24/14

Date
